# Supplementary material for: Exercise alters cortico-basal ganglia network metabolic connectivity: a mesoscopic level analysis informed by anatomic parcellation defined in the mouse brain connectome
Source: PubMed Central journal article supplement (PMC10516800; doi:10.1007/s00429-023-02659-2), 2023-06-12
Supplement: 429_2023_2659_MOESM1_ESM.pdf [file 429_2023_2659_MOESM1_ESM.pdf]

**Supplemental Fig. S1: Dot plot figure to show the data variability in rCGU between individual animals in select brain regions.** Regions-of Interest (ROIs) were selected based on anatomical landmarks in the template brain. Functional ROIs were created by combining manually drawn ROIs with the significant SPM clusters ( $P < 0.05$  for  $> 200$  contiguous significant voxels) through logical conjunction. Mean optical density of each functional ROI was extracted for each animal using the Marsbar toolbox for SPM (version 0.42, <http://marsbar.sourceforge.net/>).  $n = 10/\text{group}$ .
